# Supplementary material
Source: PubMed Central journal article supplement (PMC5441692)
Supplement: pnas.1620264114.sapp.pdf [file pnas.1620264114.sapp.pdf]

# A mathematical model of chronic pancreatitis

March 30, 2017

## Supporting Information (SI)

### Parameter estimation

A summary of all the model parameters is given in tables 1 and 2.

In the sequel, in an expression of the form  $\frac{X}{K_X+X}$  in the context of activation, the half-saturation parameter  $K_X$  is taken to be the steady state of the species  $X$  provided  $X$  tends to a steady state. Hence in steady state equations this factor is equal to  $\frac{1}{2}$ .

It is technically hard to assess the level of cytokines in acutal pancreatic tissue. We shall assume that the concentrations in the tissue may be anywhere from 2-fold to 10-fold greater in tissue compared to serum.

### Eqn. (1)

- $P_0$ : The ratio of cells volume to ECM volume varies from less than 1:10 to more than 10:1 [7]. Based on [36], we estimate the ratio between cells volume and ECM in the pancreatic islets to be close to 1:1. However, taken over the entire organ, the ratio of cells volume to ECM volume is smaller, and we take it to be 1:10. The mass of PSC is 4-7% of the total cells mass in the pancreas [4]; we take it to be 5%. Assuming average density of 1 g/ml in the pancreas, we get  $P_0 = \text{density of PSC} = 5 \times 10^{-3}$  g/ml.
- $K_{T_\alpha}$ : There are several reports on the level of TNF- $\alpha$  in serum of patients with chronic pancreatitis (CP) and in healthy control case (C). In [18], the level is 9.88 pg/ml in CP and 10.09 in C; in [24] it is 23 pg/ml in CP and 13 pg/ml, in [36] it is 8.52 pg/ml in C, and in our own clinical tests (see Supplementary Material (SM)) it was 8.54 pg/ml in PC and 4.58 pg/ml in C. We assume that the concentration of TNF- $\alpha$  in tissue is larger than in serum and take  $T_\alpha$  steady state in blood of heathy individuals to be 9 pg/ml, and  $T_\alpha = K_{T_\alpha} = 30 \text{ pg/ml} = 3 \times 10^{-11}$  g/ml in tissue.
- $K_G$ : The level of serum concentration of healthy individual was reported in [5] to be 17.5 pg/ml. Our clinical data (in SM) show concentrations of

0.102 ng/ml in CP and 0.363 ng/ml in C. We take larger tissue concentration in healthy steady state, namely,  $G = K_G = 60 \text{ ng/ml} = 6 \times 10^{-8} \text{ g/ml}$  in tissue.

- $K_{T_\beta}$ : In our clinical tests we found that the level of TGF- $\beta$  in blood was 6.602 ng/ml for CP and 7.736 ng/ml for C. On the other hand, a larger concentration of 36.75 ng/ml was reported for C in [36]. We assume that concentration of TGF- $\beta$  in tissue of healthy individuals is larger than in blood, and take  $T_\beta = K_{T_\beta} = 8 \times 10^{-7} \text{ g/ml}$ .
- $K_{I_6}$ : There are several report on the level of IL-6 in CP and C. In [24] it was reported to be 7.3 pg/ml in CP and 3.3 pg/ml in C; in [36] it was reported to be 0.58 pg/ml in C, while our clinical tests give 9.16 pg/ml in CP and 7.14 pg/ml in C. We take the level of IL-6 in healthy tissue to be  $I_6 = K_{I_6} = 8 \text{ pg/ml} = 8 \times 10^{-12} \text{ g/ml}$ .
- $\lambda_{PT_\alpha}$  and  $\lambda_{PI_6}$ : Experiments in vivo in [2, 23] reported on the activation of PSC by cytokines TGF- $\beta$ , TNF- $\alpha$  and IL-6. We assume that TGF- $\beta$  activates PSC more effectively than TNF- $\alpha$ , but less effectively than IL-6, and take  $\lambda_{PT_\beta} = 2.2 \times 10^{-2}/\text{day}$ ,  $\lambda_{PT_\alpha} = 1.82 \times 10^{-2}/\text{day}$  and  $\lambda_{PI_6} = 3.67 \times 10^{-2}/\text{day}$ .
- $\lambda_P$  and  $\lambda_{PG}$ : Experiments in [3] show that PDGF, and to lesser extend TNF- $\alpha$ , increase the proliferation of APSC. We take  $\lambda_P = 4 \times 10^{-3}/\text{day}$ , and  $\lambda_{PG} = 2.7 \times 10^{-3}/\text{day}$ .

#### Eqn. (2)

- $A_{P_0}$ : From the steady state of PSC for a healthy pancreas, we have  $A_{P_0} = d_{P_0}P_0$ . Taking  $P_0 = 5 \times 10^{-3} \text{ g/ml}$  and using the value  $d_{P_0} = 1.66 \times 10^{-2} \text{ day}^{-1}$  [33], we get  $A_{P_0} = 8.3 \times 10^{-5} \text{ g/cm}^3 \text{ day}^{-1}$ .

#### Eqn. (3)

- $d_{CM}$ : The degradation rate of MCP-1 is  $d_C = 1.73 \text{ day}^{-1}$  [6]. MCP-1 chemoattracts macrophages, so some of the cytokines get internalized by macrophage [21, 27]. We assume that the rate of internalization is the same as the rate of degradation when  $C$  is at half-saturation

$$d_C K_C = d_{CM} \frac{K_C}{K_C + K_C} M_0.$$

and  $M_0 = 5 \times 10^{-5}$  [10], we get  $d_{CM} = \frac{2d_C K_C}{M_0} = 2.08 \times 10^{-5} \text{ day}^{-1}$ .

- $K_C$ : In our clinical tests (SM) we found that the serum concentration of MCP-1 in CP is 54.66 pg/ml and in C is 58.89 pg/ml. We assume a larger concentration of MCP-1 in tissue of healthy individuals and, accordingly, take  $K_C = 300 \text{ pg/ml} = 3 \times 10^{-10} \text{ g/ml}$ .

- $\lambda_{CP}$ : According to the experiments of MCP-1 production by TNF- $\alpha$  in [30], we have the following linear relation

$$\lambda_{CP}P - d_C C = 0.$$

More precisely, the concentration of MCP-1 is 1.8 ng/ml when TNF- $\alpha$  is 100 ng/ml. Assuming that in this experiment the density of P exceeded its half-saturation  $K_P$ , we take  $\lambda_{CP} = 2 \times 10^{-7} \text{ day}^{-1}$ .

**Eqn. (6)**

- $\lambda_{\rho T_\beta}$ : We take  $\lambda_{\rho P} = 0.0432 \text{ day}^{-1}$ . It was reported in [3] that collagen synthesis with TGF- $\beta = 1 \text{ ng/ml}$ , was increased to three fold.

We assume that with such a small amount of  $T_\beta$  (compared to  $K_{T_\beta}$ ) the production would increase only 5% the collagen in the pancreas, so that

$$\lambda_{\rho T_\beta} \frac{1}{20} = 3\lambda_{\rho P}, \quad (1)$$

or  $\lambda_{\rho T_\beta} = 3\lambda_{\rho P} = 2.673 \text{ day}^{-1}$ .

- $\rho^*$ : The steady states of  $\rho^*$ ,  $Q^*$  and  $Q_r^*$  of  $\rho$ ,  $Q$  and  $Q_r$  are determined by solving the following steady state equations in healthy pancreas

$$\begin{cases} \lambda_{\rho P} P_0 \left(1 - \frac{\rho}{\rho_0}\right) - d_{\rho Q} Q \rho - d_\rho \rho = 0, \\ \lambda_{QP_0} P_0 - d_{QQ_r} Q_r Q - d_Q Q = 0, \\ \lambda_{Q_r P_0} P_0 - d_{Q_r Q} Q Q_r - d_{Q_r} Q_r = 0. \end{cases}$$

where all the parameters are given in Table 1 and 2. By direct computation, we find that  $\rho^* = 3.22 \times 10^{-4} \text{ g/cm}^3$ ,  $Q^* = 4.18 \times 10^{-6} \text{ g/cm}^3$  and  $Q_r^* = 4.24 \times 10^{-11} \text{ g/cm}^3$ .

**Eqn. (7)**

In steady state in health,  $\lambda_{T_\beta} = \frac{d_{T_\beta} T_\beta}{P}$ , where  $d_{T_\beta} = 3.33 \times 10^2/\text{day}$  [31],  $T_\beta = 8 \times 10^{-7} \text{ g/ml}$  and  $P = P_0 = 5 \times 10^{-3} \text{ g/ml}$ , so that  $\frac{d_{T_\beta} T_\beta}{P} = 5.328 \times 10^{-1}/\text{day}$ . P is proliferating, so in steady state P is larger than  $P_0$  and hence  $\lambda_{T_\beta}$  should be smaller; we take  $\lambda_{T_\beta} = 6.7 \times 10^{-2}/\text{day}$ .

**Eqn. (8)**

In steady state in health

$$\lambda_{T_\alpha} = \frac{d_{T_\alpha} T_\alpha}{M},$$

where  $d_{T_\alpha} = 55.45/\text{day}$  [25],  $T_\alpha = 3 \times 10^{-11} \text{ g/ml}$ , and  $M = M_0 = 5 \times 10^{-5} \text{ g/ml}$  [10], so that  $\frac{d_{T_\alpha} T_\alpha}{M} = 3.3 \times 10^{-5}/\text{day}$ . In chronic pancreatic case the concentration of  $T_\alpha$  is higher, so we take  $\lambda_{T_\alpha} = 9.98 \times 10^{-5}/\text{day}$ .

**Eqn. (9)**

- $\lambda_{I_6}$ : In steady state in health,  $\lambda_{I_6} = \frac{d_{I_6} I_6}{P}$  where  $d_{I_6} = 0.173/\text{day}$  [19],  $I_6 = 4 \times 10^{-12} \text{g/ml}$  and  $P = P_0 = 5 \times 10^{-3}$  so that  $\frac{d_{I_6} I_6}{P} = 1.4 \times 10^{-10}/\text{day}$ . In chronic pancreatic case P is larger than  $P_0$ , so we take the smaller value  $\lambda_{I_6} = 7 \times 10^{-11}/\text{day}$ .

**Eqn. (10)**

- $\lambda_G$ : In steady state in health,  $\lambda_G = \frac{d_G G}{P}$  where  $d_G = 2.84/\text{day}$  [34],  $G = 6 \times 10^{-8} \text{g/ml}$  and  $P = P_0 = 5 \times 10^{-3} \text{g/ml}$ . Hence  $\frac{d_G G}{P} = 4 \times 10^{-5}/\text{day}$ . For the chronic pancreatitis case P is larger than  $P_0$ , so we take  $\lambda_G = 2 \times 10^{-7} \text{day}^{-1}$ .

**Eqn. (11)**

- $\lambda_{QP_0}$  **and**  $\lambda_{QP}$ : We take  $\lambda_{QP_0} = 3.025 \times 10^{-5} \text{day}^{-1}$  as in [16]. In [26], it was reported that the amount of MMP activated by P is 30% more than that by  $P_0$ . Accordingly, we have

$$\lambda_{QP} = 1.3\lambda_{QP_0} = 3.93 \times 10^{-5} \text{day}^{-1}.$$

- $\lambda_{QT_\beta}$  **and**  $\lambda_{QI_6}$ : According to [26],  $T_\beta$  increases the production of Q by P more than  $I_6$  does, we assume that  $T_\beta$  increases this production by approximately 1-fold and  $I_6$  increases it by approximately  $\frac{1}{2}$ -fold, and take  $\lambda_{QT_\beta} = 7.6 \times 10^{-5} \text{day}^{-1}$ . and  $\lambda_{QI_6} = 3.72 \times 10^{-5} \text{day}^{-1}$ .

## Clinical data

Peripheral venous blood was collected into sodium heparin tubes by venipuncture from human patients. All studies were conducted under an IRB-approved protocol from patients with clinically confirmed chronic calcific pancreatitis (17 patients), non-calcific pancreatitis (9), a family history of pancreatic disease (non-pancreatitis) (12), and no disease(7). Blood samples were centrifuged at  $1200 \times g$  for 10 minutes to obtain plasma, and was stored at  $-80^\circ C$ . Plasma samples were batch analyzed using a custom Luminex Multiplex Cytokine Kits (Procarta Cytokine Assay Kit, Affymetrix). Analyte concentrations were calculated based on a standard curve for each analyte and represent the average of two batched duplicates. Additional single-plex ELISA kits were used to analyze the concentration of additional factors, including TGF- $\beta$  and IL-6 (R&D Systems, Inc.), as per manufacturer instructions.

Table 1: Parameters' description and value

| Parameter                | Description                                           | Value                                                        |
|--------------------------|-------------------------------------------------------|--------------------------------------------------------------|
| $D_P$                    | diffusion coefficient of activated PSC                | $1.47 \times 10^{-4} \text{ cm}^2 \text{ day}^{-1}$ [10]     |
| $D_{P_0}$                | diffusion coefficient of quiescent PSC                | $1.47 \times 10^{-4} \text{ cm}^2 \text{ day}^{-1}$ [10]     |
| $D_{M_1}$                | diffusion coefficient of M1 macrophage                | $8.64 \times 10^{-7} \text{ cm}^2 \text{ day}^{-1}$ [10]     |
| $D_{M_2}$                | diffusion coefficient of M2 macrophage                | $8.64 \times 10^{-7} \text{ cm}^2 \text{ day}^{-1}$ [10]     |
| $D_C$                    | diffusion coefficient of MCP-1                        | $17.28 \text{ cm}^2 \text{ day}^{-1}$ [10]                   |
| $D_{I_6}$                | diffusion coefficient for IL-6                        | $1.08 \times 10^{-2} \text{ cm}^2 \text{ day}^{-1}$ [10]     |
| $D_{T_\alpha}$           | diffusion coefficient for TNF- $\alpha$               | $1.29 \times 10^{-2} \text{ cm}^2 \text{ day}^{-1}$ [10]     |
| $D_{T_\beta}$            | diffusion coefficient for TGF- $\beta$                | $4.32 \times 10^{-2} \text{ cm}^2 \text{ day}^{-1}$ [12]     |
| $D_G$                    | diffusion coefficient for PDGF                        | $8.64 \times 10^{-2} \text{ cm}^2 \text{ day}^{-1}$ [10, 34] |
| $D_Q$                    | diffusion coefficient of MMP                          | $4.32 \times 10^{-2} \text{ cm}^2 \text{ day}^{-1}$ [10, 22] |
| $D_{Q_r}$                | diffusion coefficient for TIMPs                       | $4.32 \times 10^{-2} \text{ cm}^2 \text{ day}^{-1}$ [10, 22] |
| $\lambda_{PT_\beta}$     | activation rate of PSC by TGF- $\beta$                | $2.2 \times 10^{-2} \text{ day}^{-1}$ [3] & estimated        |
| $\lambda_{PT_\alpha}$    | activation rate of PSC by TNF- $\alpha$               | $1.82 \times 10^{-2} \text{ day}^{-1}$ [3, 23] & estimated   |
| $\lambda_{PI_6}$         | activation rate of PSC by IL-6                        | $3.67 \times 10^{-2} \text{ day}^{-1}$ [3, 23] & estimated   |
| $\lambda_P$              | proliferation rate of PSC by TNF- $\alpha$            | $4 \times 10^{-3} \text{ day}^{-1}$ [23] & estimated         |
| $\lambda_{PG}$           | proliferation rate of PSC by PDGF                     | $2.7 \times 10^{-3} \text{ day}^{-1}$ [3] & estimated        |
| $\lambda_{\rho P}$       | production rate of ECM due to PSC                     | $0.0432 \text{ day}^{-1}$ [15]                               |
| $\lambda_{\rho T_\beta}$ | activation rate of ECM due to TGF- $\beta$            | $2.673 \text{ day}^{-1}$ [15, 3] & estimated                 |
| $\lambda_{CP}$           | activation rate of MCP-1 due to PSC                   | $2 \times 10^{-7} \text{ day}^{-1}$ [30] & estimated         |
| $\lambda_{I_6}$          | activation rate of IL-6 due to PSC                    | $7 \times 10^{-11} \text{ day}^{-1}$ [2, 20] & estimated     |
| $\lambda_{I_6 T_\beta}$  | activation rate of IL-6 due to TGF- $\beta$           | $7 \times 10^{-11} \text{ day}^{-1}$ [2] & estimated         |
| $\lambda_{T_\alpha}$     | activation rate of TNF- $\alpha$ due to macrophage    | $9.98 \times 10^{-5} \text{ day}^{-1}$ [1] & estimated       |
| $\lambda_{T_\beta P}$    | activation rate of TGF- $\beta$ due to PSC            | $6.7 \times 10^{-3} \text{ day}^{-1}$ [25, 28] & estimated   |
| $\lambda_{T_\beta M_2}$  | activation rate of TGF- $\beta$ due to M2 macrophages | $1.5 \times 10^{-2} / \text{day}$ [11]                       |
| $\lambda_{GP}$           | activation rate of PDGF due to PSC                    | $2 \times 10^{-6} \text{ day}^{-1}$ [32]                     |
| $\lambda_{GM_2}$         | activation rate of PDGF due to M2 macrophages         | $4.8 \times 10^{-4} / \text{day}$ [13]                       |
| $\lambda_{QP_0}$         | activation rate of MMP due to quiescent PSC           | $3.025 \times 10^{-5} \text{ day}^{-1}$ [16]                 |
| $\lambda_{QP}$           | activation rate of MMP due to activated PSC           | $3.93 \times 10^{-5} \text{ day}^{-1}$ [26, 16] & estimated  |
| $\lambda_{QT_\beta}$     | activation rate of MMP by TGF- $\beta$                | $7.6 \text{ day}^{-5}$ [26, 10] & estimated                  |
| $\lambda_{QI_6}$         | activation rate of MMP by IL-6                        | $3.72 \times 10^{-5} \text{ day}^{-1}$ [26, 10] & estimated  |
| $\lambda_{Q_r P_0}$      | activation rate of TIMP due to quiescent PSC          | $6 \times 10^{-5} \text{ day}^{-1}$ [10, 17]                 |
| $\lambda_{Q_r P}$        | activation rate of TIMP due to activated PSC          | $6 \times 10^{-5} \text{ day}^{-1}$ [10, 17] & estimated     |
| $\lambda_S$              | production rate of Scar                               | 1 estimated                                                  |
| $\lambda_{SQ}$           | production rate of Scar due to MMP                    | 1 estimated                                                  |

## 1 Tables

## References

- [1] D. G. Alleva, C. J. Burger, and K. D. Elgert. Tumor-induced regulation of suppressor macrophage nitric oxide and TNF-alpha production. Role

Table 2: Parameters' description and value

| Parameter      | Description                                 | Value                                                                    |
|----------------|---------------------------------------------|--------------------------------------------------------------------------|
| $d_P$          | degradation rate of activated PSC           | $4.15 \times 10^{-2} \text{ day}^{-1}$ [33]                              |
| $d_{P_0}$      | degradation rate of quiescent PSC           | $1.66 \times 10^{-2} \text{ day}^{-1}$ [33]                              |
| $d_{M_1}$      | death rate of M1 macrophage                 | $0.02 \text{ day}^{-1}$ [8]                                              |
| $d_{M_2}$      | death rate of M2 macrophage                 | $0.015 \text{ day}^{-1}$ [9]                                             |
| $d_C$          | degradation rate of MCP-1                   | $1.73 \text{ day}^{-1}$ [6]                                              |
| $d_{CM_1}$     | degradation rate of MCP-1 due to macrophage | $2.08 \times 10^{-5} \text{ day}^{-1}$ [6, 21, 27] & estimated           |
| $d_{I_6}$      | degradation rate of IL-6                    | $0.173 \text{ day}^{-1}$ [19]                                            |
| $d_{T_\beta}$  | degradation rate of TGF- $\beta$            | $3.33 \times 10^2 \text{ day}^{-1}$ [31]                                 |
| $d_{T_\alpha}$ | degradation rate of TNF- $\alpha$           | $55.45 \text{ day}^{-1}$ [25]                                            |
| $d_\rho$       | degradation rate of ECM                     | $0.37 \text{ day}^{-1}$ [34]                                             |
| $d_G$          | degradation rate of PDGF                    | $3.84 \text{ day}^{-1}$ [34]                                             |
| $d_{Q_r}$      | binding rate of MMP to TIMP                 | $4.98 \times 10^8 \text{ cm}^3 \text{ g}^{-1} \text{ day}^{-1}$ [10]     |
| $d_{Q_r Q}$    | binding rate of TIMP to MMP                 | $1.04 \times 10^9 \text{ cm}^3 \text{ g}^{-1} \text{ day}^{-1}$ [10]     |
| $d_Q$          | degradation rate of MMP                     | $4.32 \text{ day}^{-1}$ [10, 15]                                         |
| $d_{Q_r}$      | degradation rate of TIMP                    | $21.6 \text{ day}^{-1}$ [10, 35]                                         |
| $d_{\rho Q}$   | degradation rate of ECM due to MMP          | $2.59 \times 10^7 \text{ cm}^3 \text{ g}^{-1} \text{ day}^{-1}$ [10, 16] |
| $\chi_G$       | chemotactic sensitivity parameter           | $10 \text{ cm}^5 \text{ g}^{-1} \text{ day}^{-1}$ [15, 16]               |
| $\chi_C$       | chemotactic sensitivity parameter           | $10 \text{ cm}^5 \text{ g}^{-1} \text{ day}^{-1}$ [15, 16]               |
| $A_{P_0}$      | PSC source                                  | $8.3 \times 10^{-5} \text{ g/cm}^3 \text{ day}^{-1}$ estimated           |
| $K_{I_6}$      | IL-6 half saturation                        | $8 \times 10^{-12} \text{ g/cm}^3$ [29, 24, 36], SM* & estimated         |
| $K_{T_\alpha}$ | TNF- $\alpha$ half saturation               | $3 \times 10^{-11} \text{ g/cm}^3$ [18, 36], SM* & estimated             |
| $K_{T_\beta}$  | TGF- $\beta$ half saturation                | $8 \times 10^{-7} \text{ g/cm}^3$ [36], SM* & estimated                  |
| $K_G$          | PDGF half saturation                        | $6 \times 10^{-8} \text{ g/cm}^3$ [5], SM* & estimated                   |
| $K_C$          | MCP-1 half saturation                       | $3 \times 10^{-10} \text{ g/cm}^3$ SM* & estimated                       |
| $K_P$          | PSC half saturation                         | $3 \times 10^{-3} \text{ g/cm}^3$ [14] & estimated                       |
| $P_0$          | inactive PSC density                        | $5 \times 10^{-3} \text{ g/cm}^3$                                        |
| $M_0$          | source of macrophages                       | $5 \times 10^{-5} \text{ g/cm}^3$                                        |
| $\rho_0$       | ECM density                                 | $10^{-3} \text{ gcm}^{-3}$ [17]                                          |
| $\rho^*$       | ECM density                                 | $3.22 \times 10^{-4} \text{ gcm}^{-3}$ estimated                         |
| $Q^*$          | MMP density                                 | $4.18 \times 10^{-6} \text{ gcm}^{-3}$ estimated                         |
| $Q_r^*$        | TIMP density                                | $4.24 \times 10^{-11} \text{ gcm}^{-3}$ estimated                        |
| $\beta$        | influx rate                                 | 1                                                                        |

SM\*: data from supplementary material.

- of tumor-derived IL-10, TGF-beta, and prostaglandin E2. *J. Immunol.*, 153(4):1674–1686, Aug 1994.
- [2] H. Aoki, H. Ohnishi, K. Hama, S. Shinozaki, H. Kita, H. Yamamoto, H. Osawa, K. Sato, K. Tamada, and K. Sugano. Existence of autocrine loop between interleukin-6 and transforming growth factor-beta1 in activated rat pancreatic stellate cells. *J. Cell. Biochem.*, 99(1):221–228, Sep 2006.
- [3] M. V. Apte, P. S. Haber, S. J. Darby, S. C. Rodgers, G. W. McCaughan, M. A. Korsten, R. C. Pirola, and J. S. Wilson. Pancreatic stellate cells are activated by proinflammatory cytokines: implications for pancreatic fibrogenesis. *Gut*, 44(4):534–541, Apr 1999.
- [4] M. V. Apte, R. C. Pirola, and J. S. Wilson. Pancreatic stellate cells: a starring role in normal and diseased pancreas. *Front Physiol*, 3:344, 2012.
- [5] D. F. Bowen-Pope, T. W. Malpass, D. M. Foster, and R. Ross. Platelet-derived growth factor in vivo: levels, activity, and rate of clearance. *Blood*, 64(2):458–469, Aug 1984.
- [6] D. Chen, J. M. Roda, C. B. Marsh, T. D. Eubank, and A. Friedman. Hypoxia inducible factors-mediated inhibition of cancer by GM-CSF: a mathematical model. *Bull. Math. Biol.*, 74(11):2752–2777, Nov 2012.
- [7] J. E. Davies. In vitro modeling of the bone/implant interface. *Anat. Rec.*, 245(2):426–445, Jun 1996.
- [8] J. Day, A. Friedman, and L. S. Schlesinger. Modeling the immune rheostat of macrophages in the lung in response to infection. *Proc. Natl. Acad. Sci. U.S.A.*, 106(27):11246–11251, Jul 2009.
- [9] A. Friedman, J. Turner, and B. Szomolay. A model on the influence of age on immunity to infection with Mycobacterium tuberculosis. *Exp. Gerontol.*, 43(4):275–285, Apr 2008.
- [10] W. Hao and A. Friedman. The LDL-HDL Profile Determines the Risk of Atherosclerosis: A Mathematical Model. *PLoS ONE*, 9(3):e90497, 2014.
- [11] W. Hao and A. Friedman. Mathematical model on Alzheimer’s disease. *BMC Syst Biol*, 10(1):108, Nov 2016.
- [12] W. Hao, B. H. Rovin, and A. Friedman. Mathematical model of renal interstitial fibrosis. *Proc. Natl. Acad. Sci. U.S.A.*, 111(39):14193–14198, Sep 2014.
- [13] W. Hao, L. S. Schlesinger, and A. Friedman. Modeling Granulomas in Response to Infection in the Lung. *PLoS ONE*, 11(3):e0148738, 2016.
- [14] N. Ikejiri. The vitamin A-storing cells in the human and rat pancreas. *Kurume Med J*, 37(2):67–81, 1990.

- [15] Y. Kim and A. Friedman. Interaction of tumor with its micro-environment: A mathematical model. *Bull. Math. Biol.*, 72(5):1029–1068, Jul 2010.
- [16] Y. Kim, S. Lawler, M. O. Nowicki, E. A. Chiocca, and A. Friedman. A mathematical model for pattern formation of glioma cells outside the tumor spheroid core. *J. Theor. Biol.*, 260(3):359–371, Oct 2009.
- [17] Y. Kim, S. Roh, S. Lawler, and A. Friedman. miR451 and AMPK mutual antagonism in glioma cell migration and proliferation: a mathematical model. *PLoS ONE*, 6(12):e28293, 2011.
- [18] A Kiyici, M. Ibis, S. Akbulut, S. Koklu, E. Ucar, and A. Unlu. Serum TNF-Alpha Levels in Acute and Chronic Pancreatitis. *Eur J Gen Med*, 6(2):103–107, 2009.
- [19] Z. Y. Lu, H. Brailly, J. Wijdenes, R. Bataille, J. F. Rossi, and B. Klein. Measurement of whole body interleukin-6 (IL-6) production: prediction of the efficacy of anti-IL-6 treatments. *Blood*, 86(8):3123–3131, Oct 1995.
- [20] T. A. Mace, Z. Ameen, A. Collins, S. Wojcik, M. Mair, G. S. Young, J. R. Fuchs, T. D. Eubank, W. L. Frankel, T. Bekaii-Saab, M. Bloomston, and G. B. Lesinski. Pancreatic cancer-associated stellate cells promote differentiation of myeloid-derived suppressor cells in a STAT3-dependent manner. *Cancer Res.*, 73(10):3007–3018, May 2013.
- [21] A. Mantovani and M. Locati. Housekeeping by chemokine scavenging. *Blood*, 112(2):215–216, Jul 2008.
- [22] J. Mercepide, R. Lopez De Cicco, J. S. Castresana, and A. J. Klein-Szanto. Stromelysin-1/matrix metalloproteinase-3 (MMP-3) expression accounts for invasive properties of human astrocytoma cell lines. *Int. J. Cancer*, 106(5):676–682, Sep 2003.
- [23] P. Mews, P. Phillips, R. Fahmy, M. Korsten, R. Pirola, J. Wilson, and M. Apte. Pancreatic stellate cells respond to inflammatory cytokines: potential role in chronic pancreatitis. *Gut*, 50(4):535–541, Apr 2002.
- [24] R. Mukherjee and R. Sutton. Pharmaceutical developments for chronic pancreatitis: pipelines and future options . *Pancreapedia: Exocrine Pancreas Knowledge Base*, 65(8):1333–1346, Aug 2016.
- [25] J. C. Oliver, L. A. Bland, C. W. Oettinger, M. J. Arduino, S. K. McAllister, S. M. Agüero, and M. S. Favero. Cytokine kinetics in an in vitro whole blood model following an endotoxin challenge. *Lymphokine Cytokine Res.*, 12(2):115–120, Apr 1993.
- [26] P. A. Phillips, J. A. McCarroll, S. Park, M. J. Wu, R. Pirola, M. Korsten, J. S. Wilson, and M. V. Apte. Rat pancreatic stellate cells secrete matrix metalloproteinases: implications for extracellular matrix turnover. *Gut*, 52(2):275–282, Feb 2003.



- [27] R. Schiavo, D. Baatar, P. Olkhanud, F. E. Indig, N. Restifo, D. Taub, and A. Biragyn. Chemokine receptor targeting efficiently directs antigens to MHC class I pathways and elicits antigen-specific CD8+ T-cell responses. *Blood*, 107(12):4597–4605, Jun 2006.
- [28] F. W. Shek, R. C. Benyon, F. M. Walker, P. R. McCrudden, S. L. Pender, E. J. Williams, P. A. Johnson, C. D. Johnson, A. C. Bateman, D. R. Fine, and J. P. Iredale. Expression of transforming growth factor-beta 1 by pancreatic stellate cells and its implications for matrix secretion and turnover in chronic pancreatitis. *Am. J. Pathol.*, 160(5):1787–1798, May 2002.
- [29] R. Talar-Wojnarowska, A. Gasiorowska, B. Smolarz, H. Romanowicz-Makowska, A. Kulig, and E. Malecka-Panas. Clinical significance of interleukin-6 (IL-6) gene polymorphism and IL-6 serum level in pancreatic adenocarcinoma and chronic pancreatitis. *Dig. Dis. Sci.*, 54(3):683–689, Mar 2009.
- [30] M. Uchida, T. Ito, T. Nakamura, H. Igarashi, T. Oono, N. Fujimori, K. Kawabe, K. Suzuki, R. T. Jensen, and R. Takayanagi. ERK pathway and sheddases play an essential role in ethanol-induced CX3CL1 release in pancreatic stellate cells. *Lab. Invest.*, 93(1):41–53, Jan 2013.
- [31] L. M. Wakefield, T. S. Winokur, R. S. Hollands, K. Christopherson, A. D. Levinson, and M. B. Sporn. Recombinant latent transforming growth factor beta 1 has a longer plasma half-life in rats than active transforming growth factor beta 1, and a different tissue distribution. *J. Clin. Invest.*, 86(6):1976–1984, Dec 1990.
- [32] L. N. Walker, D. F. Bowen-Pope, R. Ross, and M. A. Reidy. Production of platelet-derived growth factor-like molecules by cultured arterial smooth muscle cells accompanies proliferation after arterial injury. *Proc. Natl. Acad. Sci. U.S.A.*, 83(19):7311–7315, Oct 1986.
- [33] P. Weissman-Shomer and M. Fry. Chick embryo fibroblasts senescence in vitro: pattern of cell division and life span as a function of cell density. *Mech. Ageing Dev.*, 4(2):159–166, 1975.
- [34] C. Xue, A. Friedman, and C. K. Sen. A mathematical model of ischemic cutaneous wounds. *Proc. Natl. Acad. Sci. U.S.A.*, 106(39):16782–16787, Sep 2009.
- [35] S. Yamamoto and J. H. Nguyen. TIMP-1/MMP-9 imbalance in brain edema in rats with fulminant hepatic failure. *J. Surg. Res.*, 134(2):307–314, Aug 2006.
- [36] R. P. Zimmermann, G. Feil, C. Bock, L. Hoeltl, and A. Stenzl. Significant alterations of serum cytokine levels in patients with Peyronie’s disease. *Int Braz J Urol*, 34(4):457–466, 2008.
